# Supplementary material for: Myd88 Signaling Is Involved in the Inflammatory Response in LPS-Induced Mouse Epididymitis and Bone-Marrow-Derived Dendritic Cells
Source: MDPI journal article supplement (doi:10.3390/ijms24097838), 2023-04-25
Supplement: s1 [file s1]

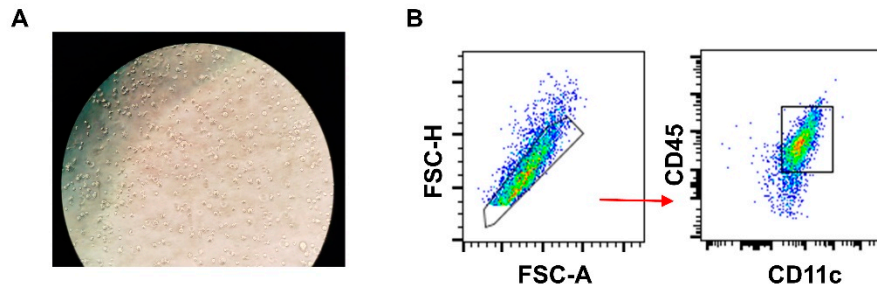

**Figure S1.** Identification of BMDCs. **A.** Morphology of BMDCs on day 8. **B.** Flow cytometry analysis of phenotype of BMDCs (CD45<sup>+</sup>CD11c<sup>+</sup>, gating from live cells).

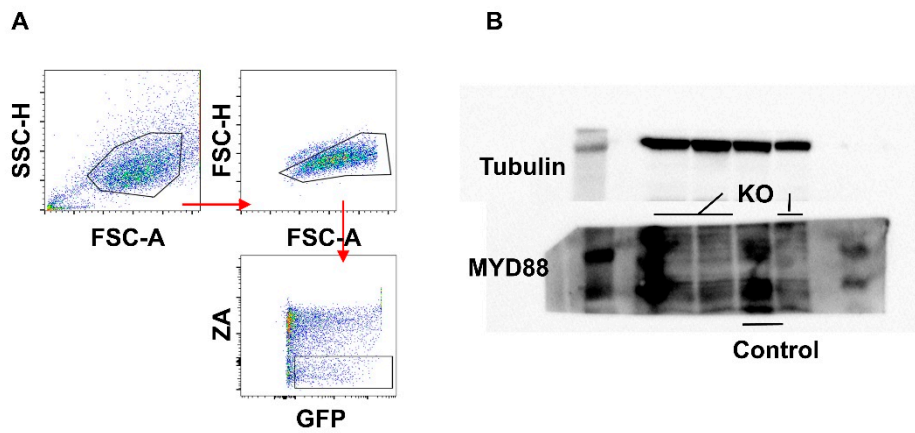

**Figure S2.** Representative flow cytometry plots of sorting DC2s and original image of western blot. **A.** Representative flow cytometry plots of gating strategy for sorting DC2s which demonstrated successful transfection with plasmid containing *Myd88* gRNA. **B.** Original image of western blot showed MYD88 expression in *Myd88*-KO DC2s and control.

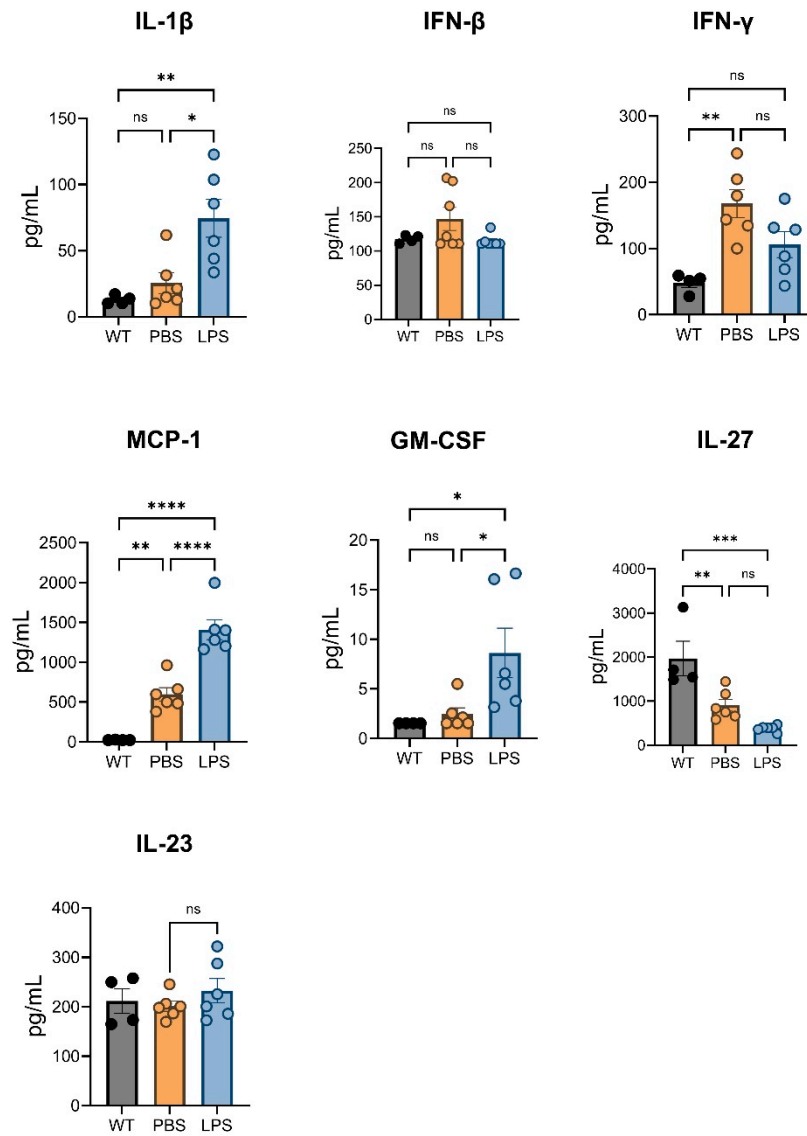

**Figure S3.** Comparison of other inflammatory cytokines detected in cauda epididymis 24 hours after LPS treatment. The concentration of IL-1 $\beta$ , IFN- $\beta$ , IFN- $\gamma$ , MCP-1, GM-CSF, IL-27, and IL-23 was measured in wild type (WT), sham treated controls (PBS), and LPS-induced mice (WT:  $n=4$ , PBS and LPS:  $n=6$ ). Results were expressed as mean  $\pm$  SD and were analyzed by one-way ANOVA. \* $p<0.05$ , \*\* $p<0.01$ , \*\*\* $p<0.001$ , \*\*\*\* $p<0.0001$ ; ns, not significant.

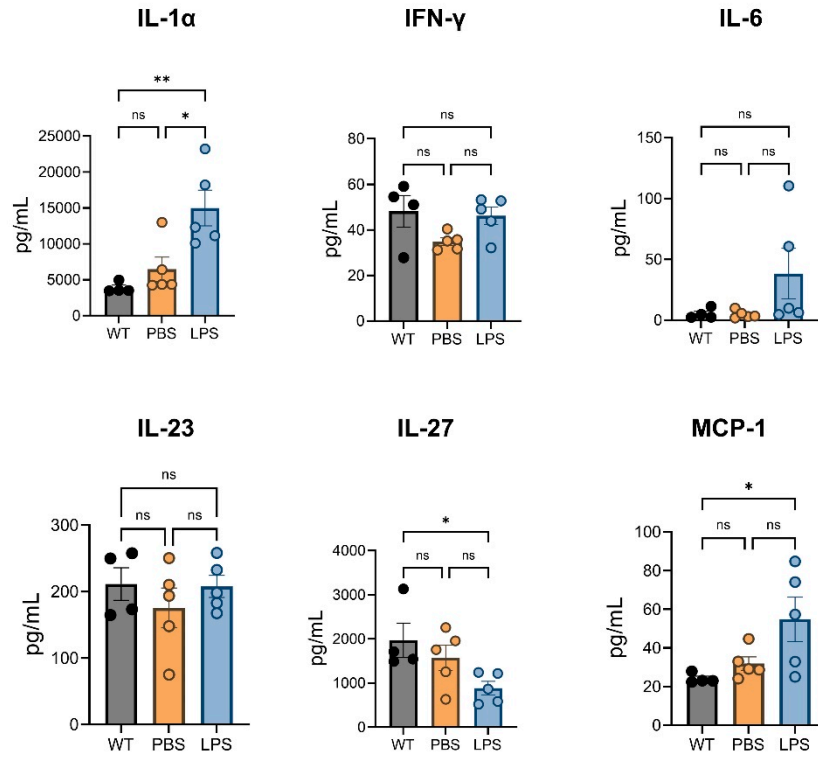

**Figure S4.** Inflammatory cytokines detected in cauda epididymis at 7 days after LPS treatment. Comparison of IL- $\alpha$ , IFN- $\gamma$ , IL-6, IL-23, IL-27, and MCP-1 in WT, PBS, and LPS-induced mice (WT:  $n=4$ , PBS and LPS:  $n=5$ ). Results are expressed as mean  $\pm$  SD and were analyzed by one-way ANOVA. \* $p<0.05$ , \*\* $p<0.01$ ; ns, not significant.

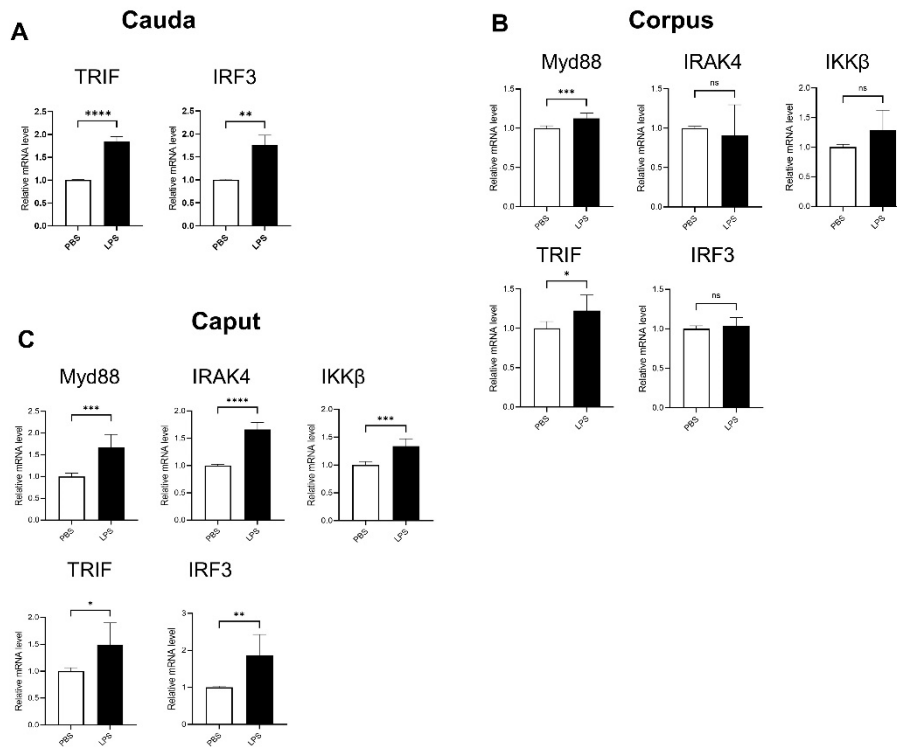

**Figure S5.** The mRNA of *Myd88/TRIF* signaling pathway expressed in caput, corpus, and cauda in LPS-induced mouse epididymitis. **A.** Analysis of relative mRNA expression of *TRIF* and *IRF3* in cauda epididymis between PBS and LPS groups. **B-C:** Comparison of relative mRNA expression of *MyD88*, *IRAK4*, *IKKβ*, *TRIF* and *IRF3* in corpus (**B**) and caput (**C**) and epididymis between PBS and LPS group. Data were represented as mean  $\pm$  SD of three independent experiments and analyzed by independent t-test. \* $p < 0.05$ , \*\* $p < 0.01$ , \*\*\* $p < 0.001$ , \*\*\*\* $p < 0.0001$ ; ns, not significant.

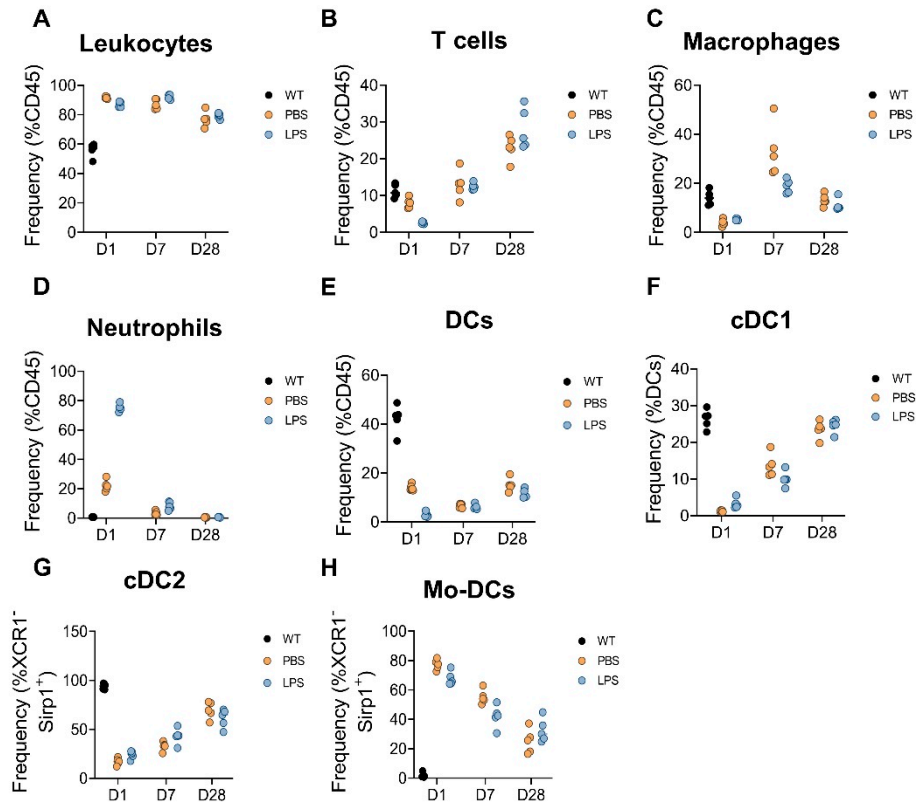

**Figure S6.** The percentage of immune cells in LPS-induced mouse epididymitis at different time points. **A-D:** The percentage of epididymal leukocytes, T cells, macrophages and neutrophils was detected in WT, PBS, and LPS groups at 1, 7, 28 days after treatment ( $n=5$ ). **F-H:** The proportion of epididymal DCs and subsets was measured at the indicated time point ( $n=5$ ).

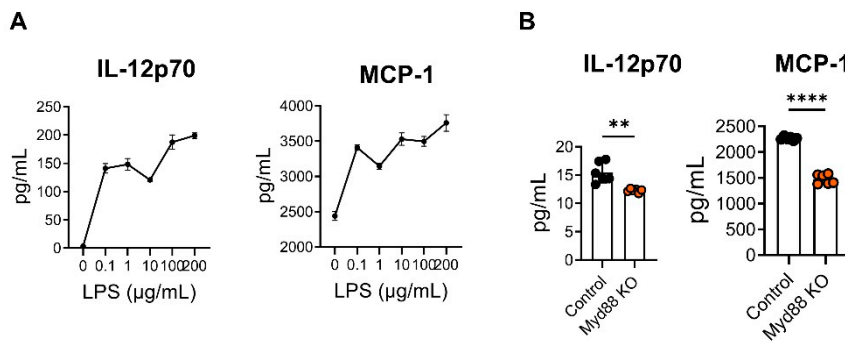

**Figure S7.** Other Inflammatory cytokines in mouse bone marrow-derived dendritic cells (BMDCs) with CRISPR-Cas9 mediated *Myd88* knockout. **A.** The concentration of IL-12p70 and MCP-1 in the supernatants after 24 hours with 0-0.1-1-10-100-200 µg/ml LPS stimulation ( $n=3$ ). **B.** Comparison of IL-12p70 and MCP-1 secreted by *Myd88*-KO BMDCs and control were analyzed. Data were expressed as mean  $\pm$  SD and statistics were analyzed by independent t test ( $n=6$ ), \*\* $p < 0.01$ , \*\*\*\* $p < 0.0001$ .
