# Supplementary material for: Myd88 Signaling Is Involved in the Inflammatory Response in LPS-Induced Mouse Epididymitis and Bone-Marrow-Derived Dendritic Cells
Source: MDPI journal article supplement (doi:10.3390/ijms24097838), 2023-04-25
Supplement: s1 [file s1]

**Table S1.** Primers used for PCR and RT-PCR.

| Species | Primer name                  | Forward primer (5'-3')  | Reverse primer (5'-3') |
|---------|------------------------------|-------------------------|------------------------|
| mouse   | <i>Gapdh</i>                 | CTGACTTCAACAGCGACACC    | TAGCCAAATTCGTTGTCATACC |
|         | <i>Myd88</i>                 | ATGGTGGTGGTTGTCTCTGA    | TGCTGGGGAACTCTTTCTTC   |
|         | <i>Myd88<sup>#</sup></i>     | GCGCTTAACGTGGGAGTG      | ATATCCTCACGGTCTAACAAGG |
|         | <i>Irak4</i>                 | GGTCCAGATTGAGCTGTTTGCC  | GTTTGTGCCACTGTTGCCGCTT |
|         | <i>Ikk<math>\beta</math></i> | GCAGACTGACATTGTGGACCTG  | ATCTCCTGGCTGTCACCTTCTG |
|         | <i>Trif</i>                  | ATCCATGCCAGGGCTGATGAAC  | CGATGGCATCTTGGAGACAGTG |
|         | <i>Irf3</i>                  | CGGAAAGAAGTGTTGCGGTTAGC | CAGGCTGCTTTTGCCATTGGTG |

<sup>#</sup>Primer used for PCR**Table S2** List of antibodies used for flow cytometry analysis.

| Antibodies                                          | Source      | Clone     | Cat.No     |
|-----------------------------------------------------|-------------|-----------|------------|
| R718 Rat Anti-Mouse CD45                            | BD          | I3/2.3    | 567464     |
| PE-CF594 Hamster Anti-Mouse CD3e                    | BD          | 145-2C11  | 562286     |
| PE-Cy <sup>TM</sup> 7 Rat Anti-Mouse Ly-6G          | BD          | 1A8       | 560601     |
| BV650 Rat Anti-CD11b                                | BD          | M1/70     | 563402     |
| Brilliant Violet 605 <sup>TM</sup> anti-mouse F4/80 | BioLegend   | BM8       | 123133     |
| SIGLEC H Monoclonal Antibody (eBio440c), PE         | eBioscience | eBio440c  | 12-0333-82 |
| BV421 Armenian Hamster Anti-Mouse CD11c             | BD          | N418      | 565452     |
| BB515 Rat Anti-Mouse I-A/I-E                        | BD          | 2G9       | 565254     |
| APC/Cyanine7 anti-mouse/rat XCR1 Antibody           | Biolegend   | ZET       | 148224     |
| APC Rat anti-Mouse CD172a                           | BD          | P84       | 560106     |
| BV786 Mouse Anti-Mouse CD64 a and b Alloantigens    | BD          | X54-5/7.1 | 741024     |
